# Supplementary material for: Binding of LncRNA-DACH1 to dystrophin impairs the membrane trafficking of Nav1.5 protein and increases ventricular arrhythmia susceptibility
Source: Research Square preprint supplement (doi:10.21203/rs.3.rs-156367/v1), 2021-02-04
Supplement: Supplementary file 1 [file b9bfc72474982ecc1e031d38.docx]

**Supplemental materials**

**Binding of LncRNA-DACH1 to dystrophin impairs the membrane trafficking of Nav1.5 protein and increases ventricular arrhythmia susceptibility**

**Supplemental Figure 1**


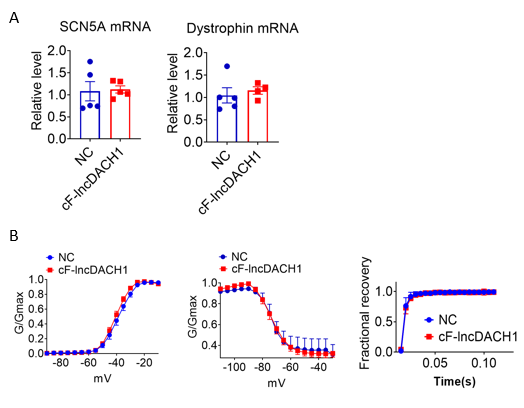


**Supplemental Figure1.** **The conserved fragment of lncDACH1(cF-lncDACH1) inhibited sodium channel function in mice.** **(A)** The mRNA levels of SCN5A and dystrophin. N=4-5. **(B)** Kinetics of *I*Na. N=6-17 cells from 3 or more mice.

**Supplemental Figure 2**


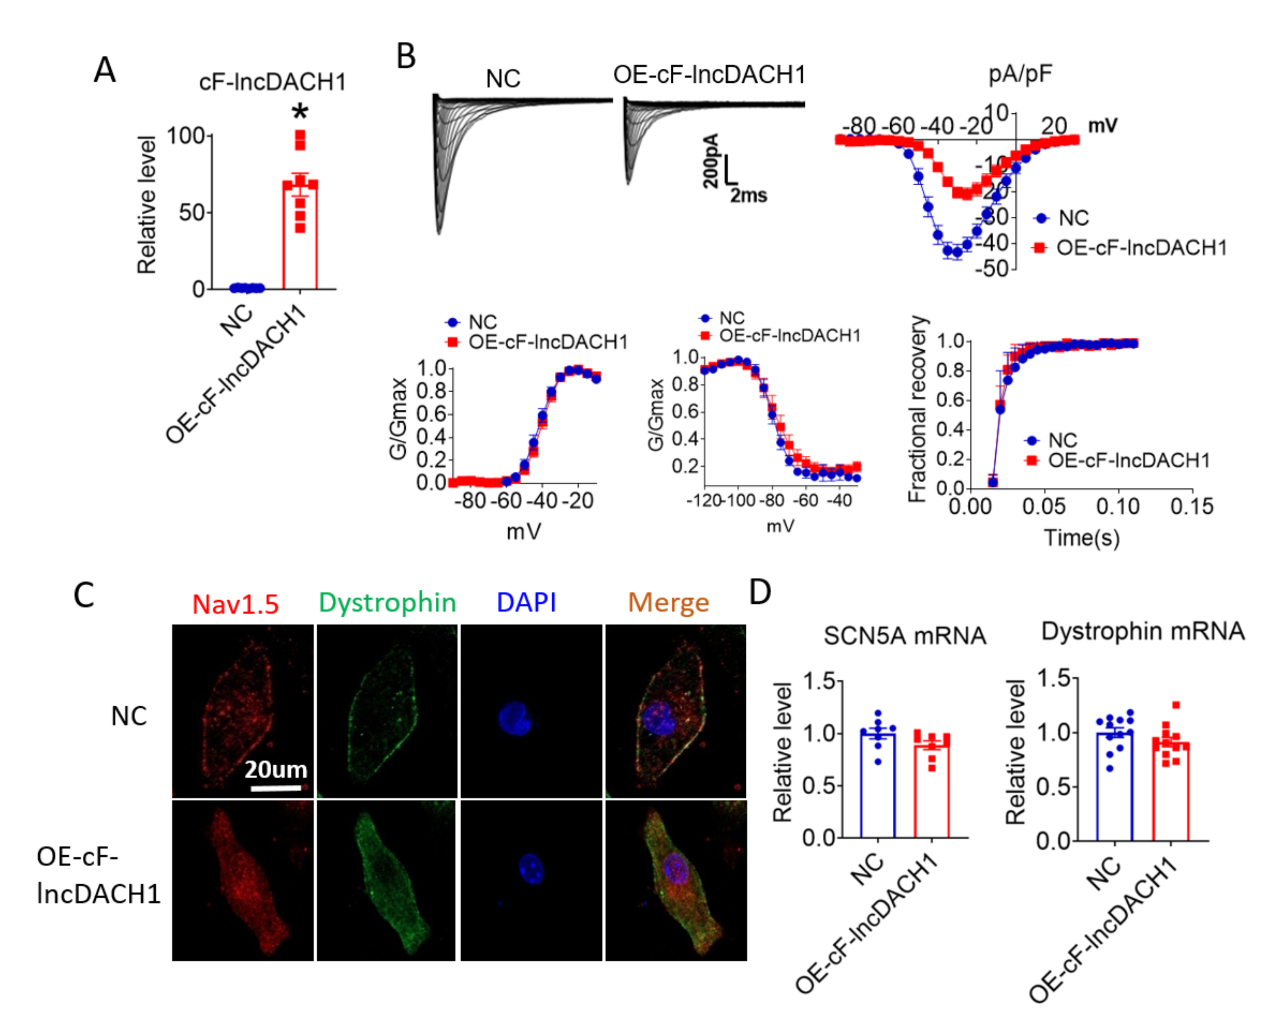


**Supplemental Figure2.** **Effects of cF-lncDACH1 overexpression on sodium channel expression and function in cultured neonatal cardiomyocytes. (A)** Verification of the expression of cF-lncDACH1 after transfection of adenovirus carrying cF-lncDACH1. N=8 from 3 independent cultures. *P<0.05 versus NC (negative control, empty plasmid). P-values were determined by unpaired t test. **(B)** Peak *I*Na currents, I-V curves and kinetics of *I*Na. N=8-15 cells from 3 independent cultures. **(C)** Distribution of Nav1.5 and dystrophin by immunofluorescent staining. **(D)** The mRNA levels of dystrophin and SCN5A. N=8-12 from 3 independent cultures.

**Supplemental Figure 3**


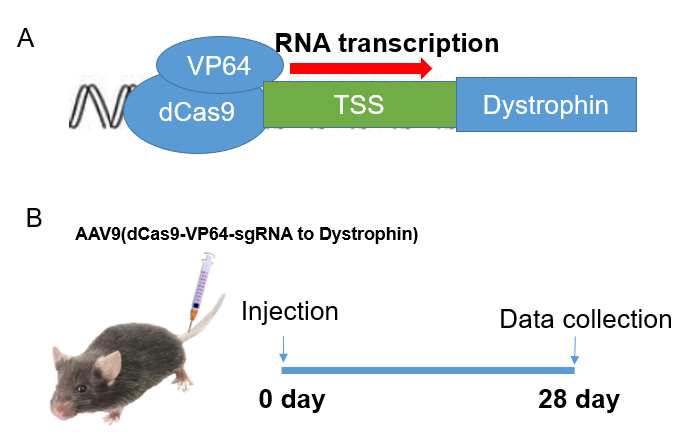


**Supplemental Figure 3. Schematic model for the construction of AAV9 virus carrying the dCas9-SAM system (A) to activate the transcription of dystrophin and tail-vein injection to mice (B).** VP64, VP64 transactivator; dCas9, deactivated CRISPR associated protein 9 nuclease. TSS, transcriptional start point.
